# Supplementary material
Source: PubMed Central journal article supplement (PMC4692125)
Supplement: Supp_Figure1.pdf [file Supp_Figure1.pdf]

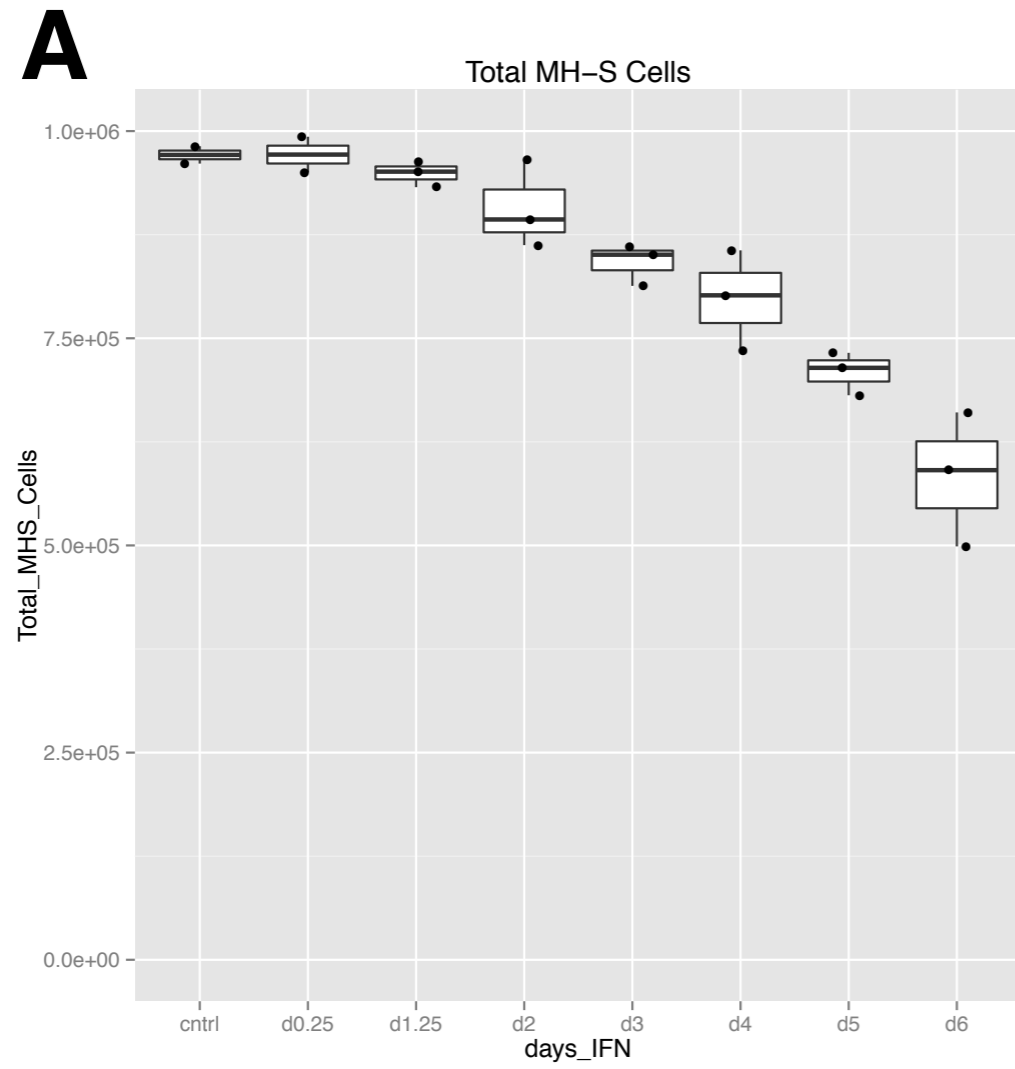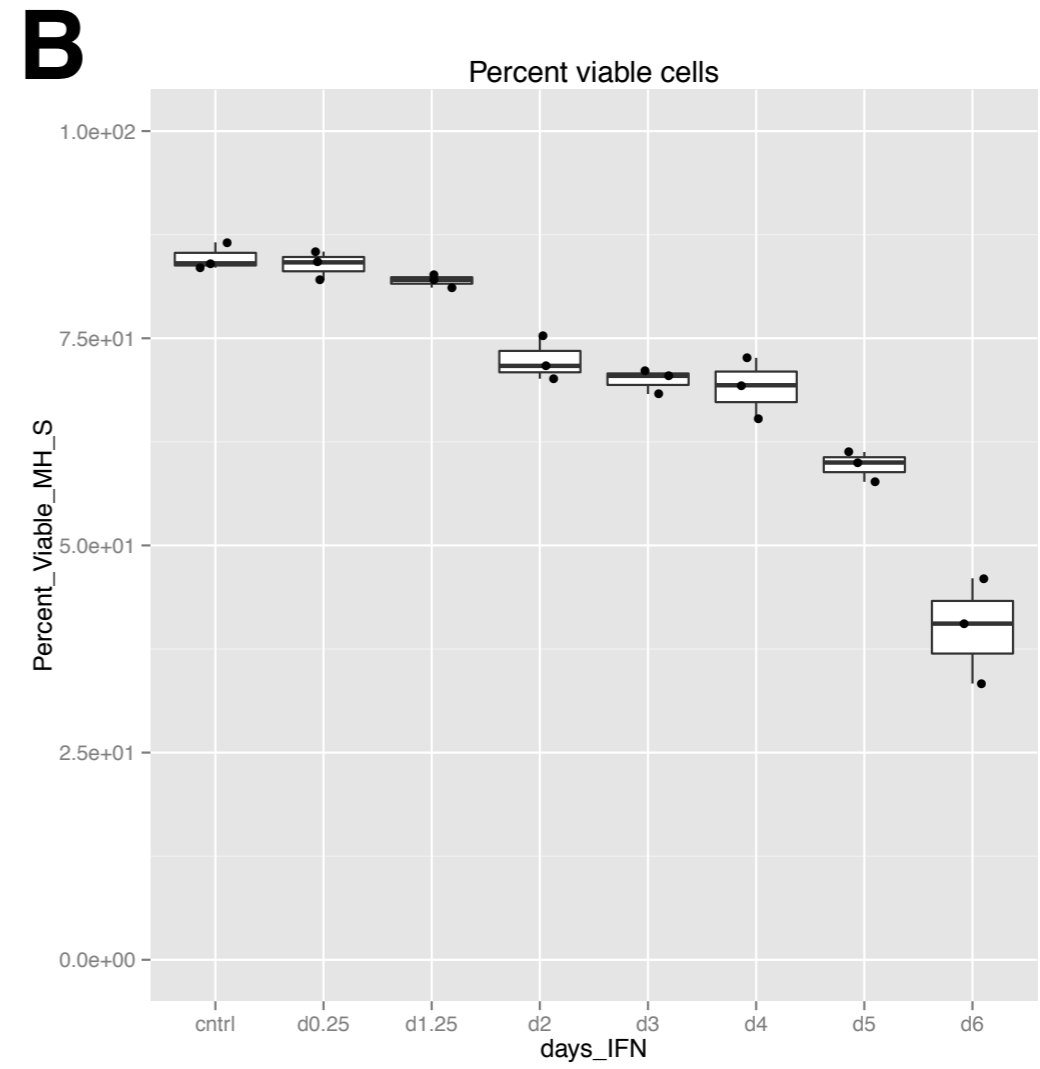

**Supplementary Figure S1: Total MH-S cells and Percent viable MH-S cells.**

A) Total number of MH-S cells (per ml.) are plotted versus days of IFN-gamma treatment.

B) Percent of viable MH-S cells are plotted against days of IFN-gamma treatment.
