# Supplementary material
Source: PubMed Central journal article supplement (PMC4692125)
Supplement: Supp_Figure2.pdf [file Supp_Figure2.pdf]

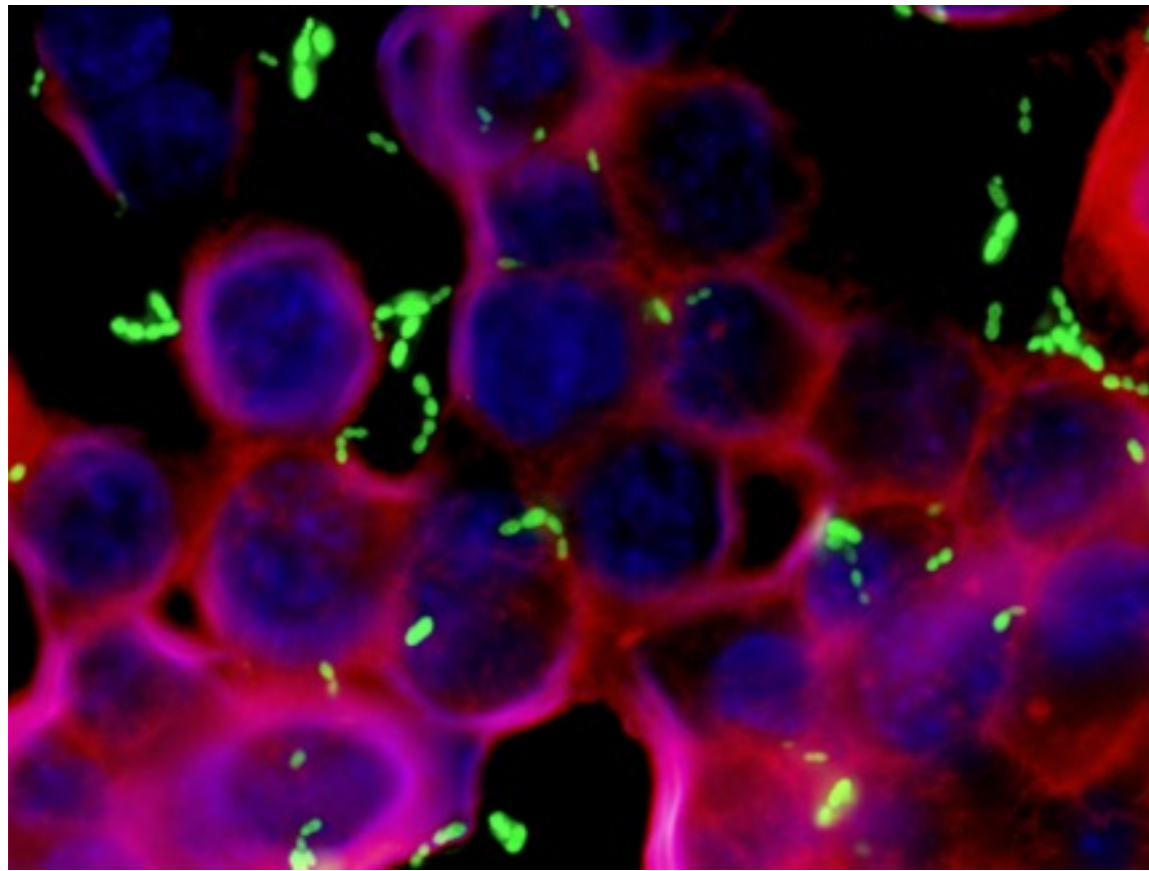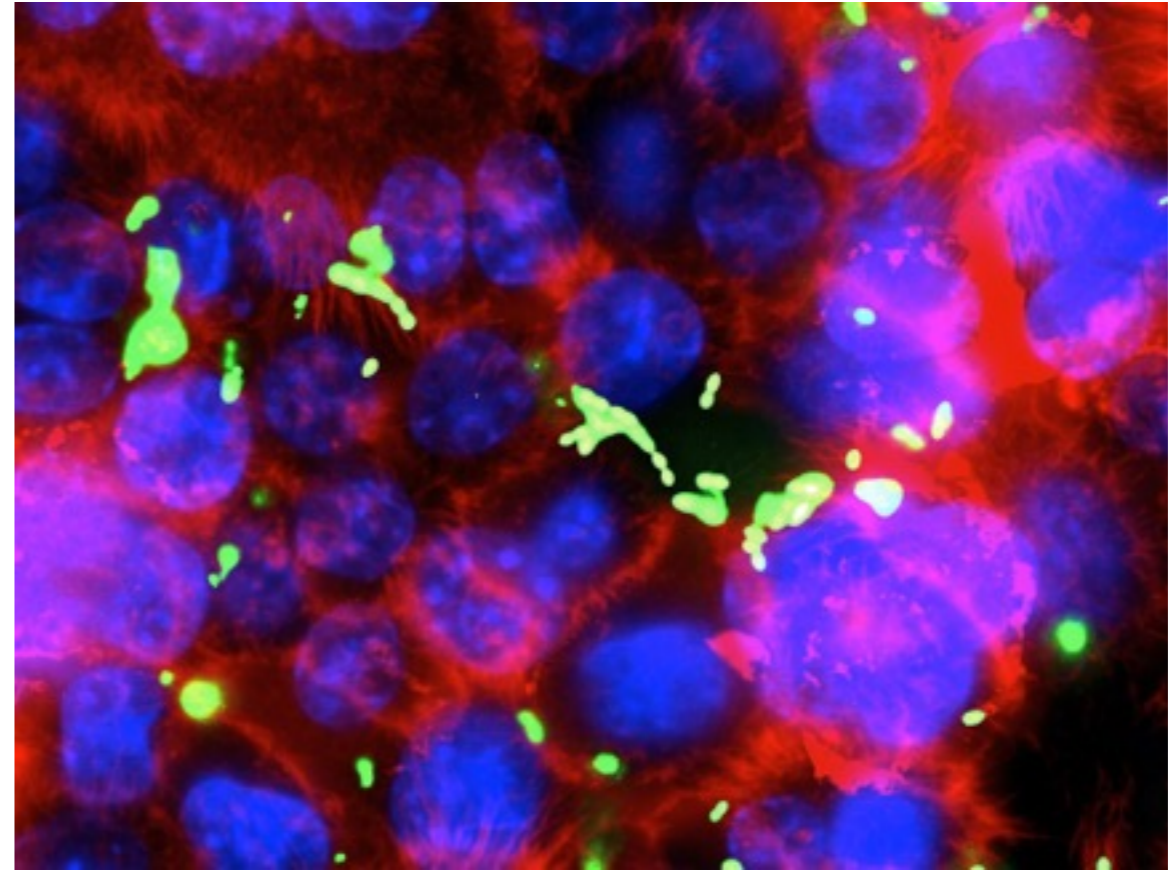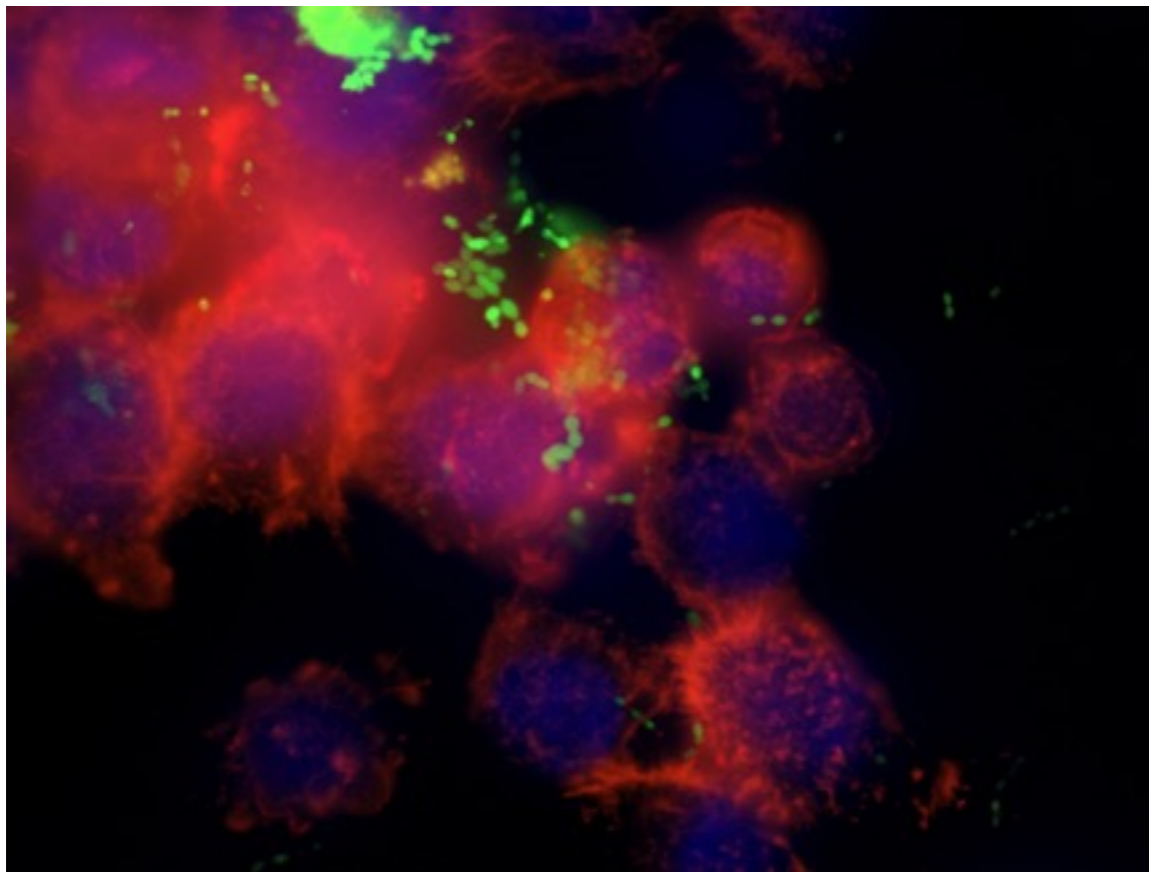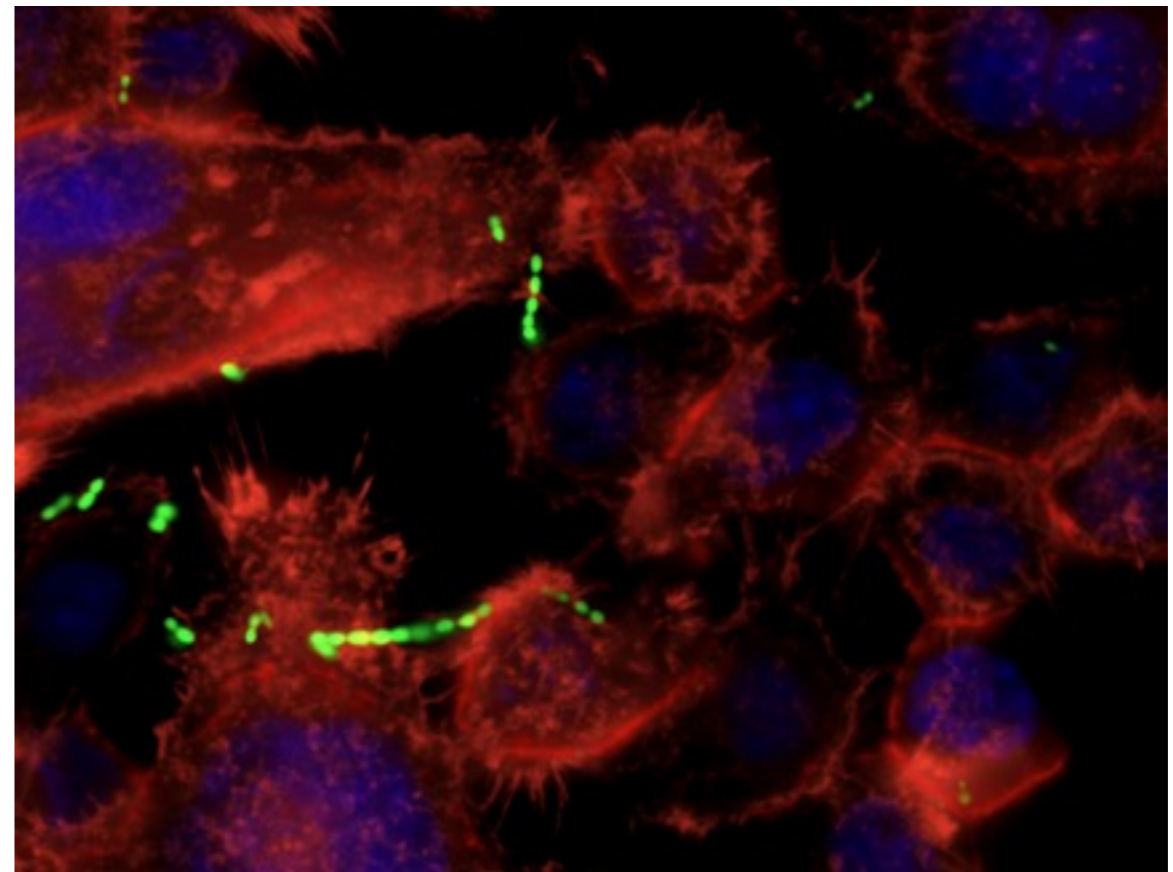

Supplementary Figure S2: To ensure that washing 3x with PBS was sufficient to remove all extracellular unbound bacteria, a small subset of samples were washed with PBS and fixed after 20 minutes of incubation with pneumococci and stained for actin (red) to verify that remaining pneumococci were associated with MH-S cells and not simply adherent to the glass coverslip.
