# Supplementary material
Source: PubMed Central journal article supplement (PMC4692125)
Supplement: Supp_Figure4.pdf [file Supp_Figure4.pdf]

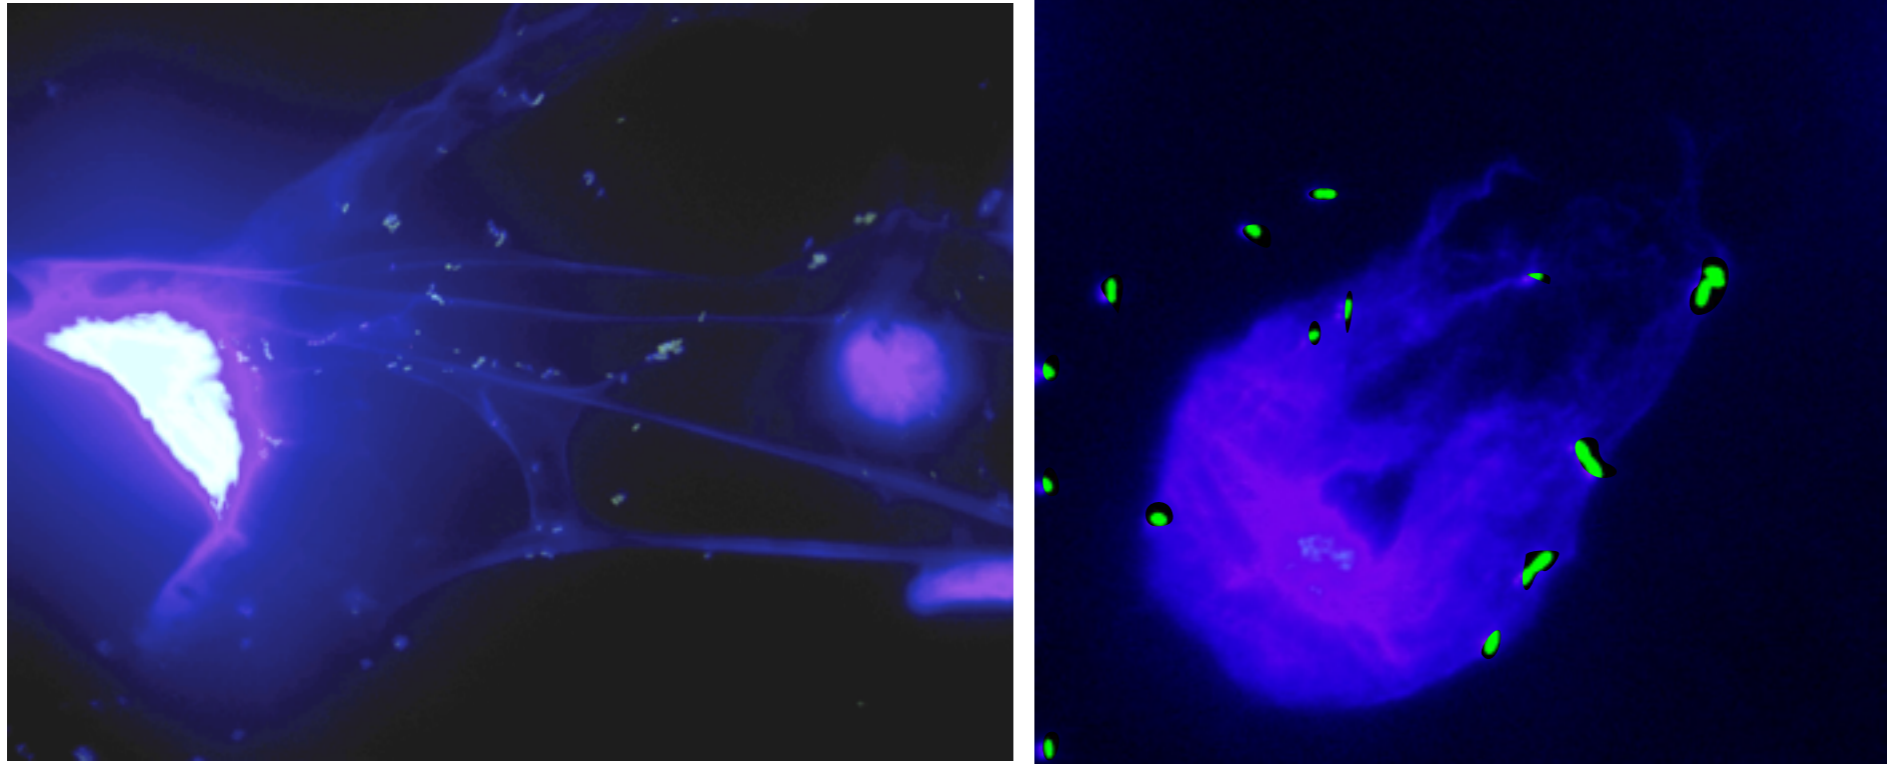

Supplementary Figure S4. Two examples of macrophage extracellular trap type phenotypes observed. In these images dapi staining occurs throughout the cell, suggesting nuclear membrane breakdown and DNA release and, particularly evident in A is an extraordinary capacity to trap bacteria within the net-like membrane extensions, without evidence of internalization.
